# Supplementary material for: Concurrent Blockade of Endothelial EGFR and VEGF Signaling on Malignant Associated Pleural Fluid Induced Angiogenesis: From Clinic to Bench
Source: MDPI journal article supplement (doi:10.3390/biomedicines9101327), 2021-09-26
Supplement: s1 [file s1]

**Supplementary Table S1.** Characteristics of lung adenocarcinoma patients with MPE (n=597).

| Variable                       | With<br>Bevacizumab<br>(n=67) | Without<br>Bevacizumab<br>(n=530) | <i>p</i> |
|--------------------------------|-------------------------------|-----------------------------------|----------|
| Gender, n(%)                   |                               |                                   | 0.35     |
| Male                           | 26 (38.8)                     | 237 (44.7)                        |          |
| Female                         | 41 (61.2)                     | 293 (55.3)                        |          |
| Age, yr                        |                               |                                   | <.0001   |
| Median                         | 59                            | 68                                |          |
| Range                          | 31-91                         | 30-105                            |          |
| ECOG PS, n(%)                  |                               |                                   | 0.0387   |
| 0                              | 30 (44.8)                     | 178 (33.6)                        |          |
| 1                              | 33 (49.3)                     | 264 (49.8)                        |          |
| 2+                             | 4 (6.0)                       | 88 (16.6)                         |          |
| Smoking, n(%)                  |                               |                                   |          |
| Current or former              | 16 (23.9)                     | 165 (31.1)                        | 0.22     |
| CCI, n(%)                      |                               |                                   | 0.08     |
| 0                              | 45 (67.2)                     | 342 (64.5)                        |          |
| 1-2                            | 16 (23.9)                     | 89 (16.8)                         |          |
| 3+                             | 6 (9.0)                       | 99 (18.7)                         |          |
| EGFR mutation positive, n(%)   |                               |                                   | 0.38     |
| L858R or exon19del             | 47 (70.1)                     | 343 (64.7)                        |          |
| Others                         | 20 (29.9)                     | 187 (35.3)                        |          |
| EGFR target therapy drug, n(%) |                               |                                   |          |
| Gefitinib                      | 23 (34.3)                     | 241 (45.5)                        | 0.08     |
| Erlotinib                      | 53 (79.1)                     | 278 (52.5)                        | <.0001   |
| Afatinib                       | 14 (20.9)                     | 70 (13.2)                         | 0.09     |
| Osimertinib                    | 14 (20.9)                     | 26 (4.9)                          | <.0001   |

Abbreviations: CCI, Charlson comorbidity index; ECOG PS, Eastern Cooperative Oncology Group performance status; EGFR, epidermal growth factor receptor; n, number of patients.

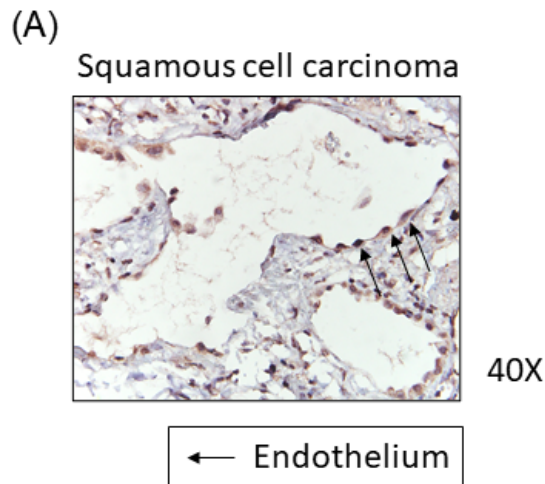

**Supplementary Figure S1.** Immunostaining for EGFR in pleural tissue of lung squamous carcinoma at a magnification of x400. Increased EGFR expression was found in the pleural endothelium of squamous cell carcinoma endothelial cells. ( ←, endothelial cell).

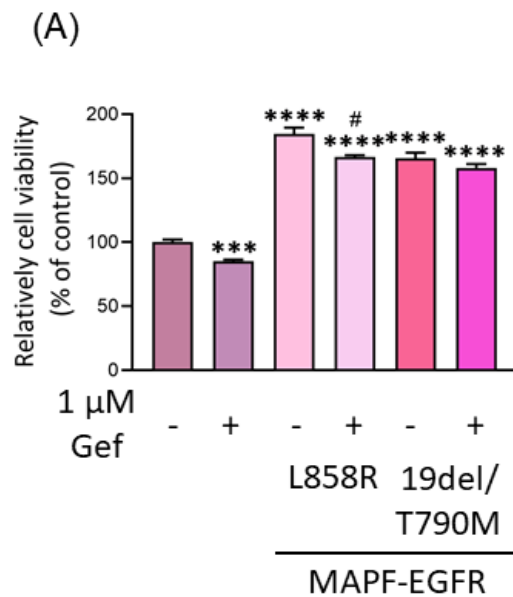

**Supplementary Figure S2.** Gefitinib treatment alters endothelial proliferation induced by MAPF: (A) HUVECs were incubated in the presence or absence of 1 μM gefitinib, EGFR inhibitor, and with MAPF for the indicated time. Cell viability was analyzed by the MTT assay after 24 h of treatment. \*\*\* $p < 0.005$ ; \*\*\*\* $p < 0.0001$ , compared to the control group. # $p < 0.05$ , compared to the MAPF group.

(A)

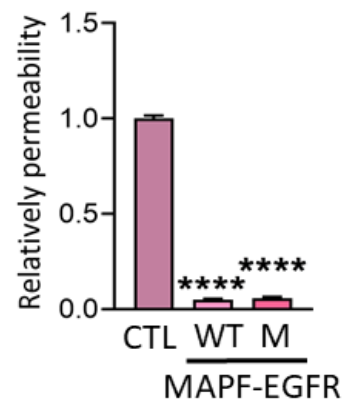

(B)

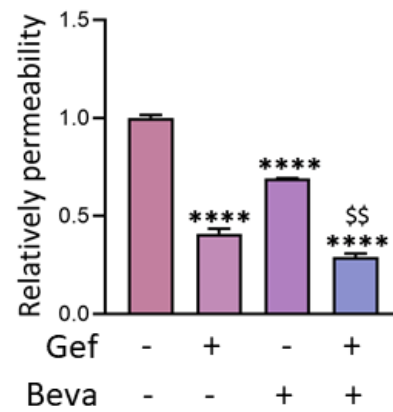

**Supplementary Figure S3.** Effects of gefitinib, bevacizumab, and MAPF on endothelial permeability measured by Transwell permeability assays after 18 h treatment: (A) HUVECs incubated with MAPF or control medium for 18 h. MAPF from patients with wild-type (WT) and mutant (M) EGFR were analyzed separately; (B) HUVEC cells were treated with gefitinib (Gef), bevacizumab (Beva), or Gef/Beva in combination. \*\*\*\*;  $p < 0.0001$ , compared to the control group. \$\$ $p < 0.01$ , compared to the gefitinib-treated group.
